# Supplementary material
Source: Research Square preprint supplement (doi:10.21203/rs.3.rs-9971106/v1)
Supplement: Supplementary file 1 [file 8073eedc6f09987290b26592.docx]

# Supplementary Materials

**Supplementary Figure 1 Global and regional distribution of major amputation incidence (2023)**


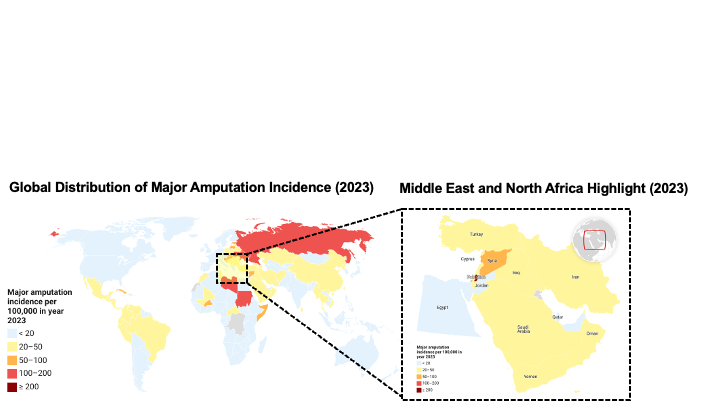


**Supplementary Figure 1. Global and regional distribution of major amputation incidence (2023).** (A) Choropleth map of major amputation incidence rates per 100,000 population across 204 countries and territories, derived from IHME Global Burden of Disease 2023 estimates. Countries are color-coded by rate category: light blue (<20), yellow (20–50), orange (50–100), red (100–200), and dark red (≥200 per 100,000). Palestine (1,313 per 100,000; 95% UI: 444–3,069) is the sole country in the highest category. Gray shading indicates countries with no available data. The dashed box indicates the Middle East and North Africa region shown in detail in Panel B. (B) Detailed map of the MENA region across 21 countries with available data, using the same color scale as Panel A. Palestine is prominently labeled; Syria (88.6 per 100,000), Libya (105.7 per 100,000), and Yemen (40.8 per 100,000) represent the region's second, third, and fourth highest rates, respectively. Palestine's rate is 14.8-fold higher than Syria, 12.4-fold higher than Libya, and 32.2-fold higher than Yemen. Data source: Institute of Health Metrics and Evaluation, GBD 2023.

**Supplementary Table S1.** Full ranked list — active conflict states 2023

*Complete list of 34 countries with active conflict classification designated by the UCDP/PRIO Armed Conflict Dataset v25.1. War-level = ≥1,000 battle-related deaths per year per UCDP. All rates per 100,000.*

| **#** | **Country** | **Rate/100k** | **UI Upper** | **UI Lower** | **War-level?** |
| --- | --- | --- | --- | --- | --- |
| 1 | Palestine | 1,313.1 | 3,068.5 | 444.4 | Yes — comparand |
| 2 | Ukraine | 147.4 | 299.8 | 67.7 | Yes |
| 3 | Russian Federation | 129.1 | 271.3 | 64.1 | Yes |
| 4 | Sudan | 114.9 | 257.7 | 45.8 | Yes |
| 5 | Syrian Arab Republic | 88.6 | 189.3 | 36.1 | Yes |
| 6 | Burkina Faso | 88.3 | 203.3 | 34.0 | Yes |
| 7 | Somalia | 66.3 | 145.0 | 28.4 | Yes |
| 8 | Türkiye | 41.1 | 87.5 | 20.6 | No |
| 9 | Mali | 34.8 | 73.9 | 16.1 | No |
| 10 | Central African Republic | 31.9 | 63.2 | 16.5 | No |
| 11 | Myanmar | 30.2 | 53.4 | 17.9 | Yes |
| 12 | Colombia | 29.5 | 42.4 | 21.1 | No |
| 13 | Azerbaijan | 24.9 | 40.8 | 16.0 | No |
| 14 | Iraq | 23.6 | 35.2 | 16.8 | No |
| 15 | Thailand | 23.3 | 34.4 | 15.9 | No |
| 16 | Israel | 22.3 | 46.1 | 10.3 | Yes |
| 17 | Dem. Rep. Congo | 22.1 | 39.1 | 13.0 | No |
| 18 | Afghanistan | 21.1 | 30.2 | 15.0 | No |
| 19 | Iran | 20.4 | 28.0 | 15.2 | No |
| 20 | India | 19.5 | 29.8 | 12.9 | No |
| 21 | Ethiopia | 17.9 | 32.6 | 10.2 | Yes |
| 22 | Niger | 14.5 | 36.5 | 7.8 | No |
| 23 | Cameroon | 13.7 | 22.1 | 8.9 | No |
| 24 | Mozambique | 13.6 | 19.3 | 9.9 | No |
| 25 | Indonesia | 13.4 | 19.5 | 9.4 | No |
| 26 | Nigeria | 12.6 | 20.4 | 8.3 | Yes |
| 27 | Kenya | 11.7 | 15.9 | 8.6 | No |
| 28 | Togo | 11.2 | 15.8 | 8.2 | No |
| 29 | Philippines | 11.2 | 15.5 | 8.2 | No |
| 30 | Burundi | 10.9 | 16.0 | 7.9 | No |
| 31 | Chad | 9.7 | 13.2 | 7.2 | No |
| 32 | Pakistan | 9.4 | 12.9 | 7.0 | No |
| 33 | Benin | 9.3 | 12.6 | 7.0 | No |
| 34 | Rwanda (2023) | 9.3 | 12.7 | 6.8 | No |

**Supplementary Table S2.** Amputation incidence by aggregated age group, Palestine 2023 vs. 33 active conflict states

| **Population group** | **Sex** | **Palestine rate (95% UI)** | **Conflict-state mean /100k** | **Z-score** | **Fold above mean** |
| --- | --- | --- | --- | --- | --- |
| **Children <20 yrs (primary)** | Male | 1,488.3 (505–3,381) | 40.7 | 22.7σ | 36.6× |
|  | Female | 1,643.0 (404–4,386) | 35.9 | 31.8σ | 45.8× |
|  | **Both** | **1,563.8 (478–3,773)** | **38.3** | **26.9σ** | **40.8×** |
| **Children 0–14 yrs (sensitivity)** | Male | 1,629.2 (545–3,817) | 17.4 | 84.1σ | 93.8× |
|  | Female | 1,666.5 (407–4,503) | 27.2 | 44.6σ | 61.4× |
|  | **Both** | **1,647.4 (506–3,968)** | **22.2** | **58.6σ** | **74.3×** |
| **Older adults 60+ (primary)** | Male | 770.5 (290–1,656) | 50.2 | 24.5σ | 15.4× |
|  | Female | 825.7 (239–1,927) | 44.4 | 35.1σ | 18.6× |
|  | **Both** | **798.8 (291–1,762)** | **46.9** | **31.2σ** | **17.0×** |
| **Older adults 70+ (sensitivity)** | Male | 324.3 (133–671) | 56.8 | 13.2σ | 5.7× |
|  | Female | 985.7 (293–2,385) | 64.2 | 33.0σ | 15.4× |
|  | **Both** | **685.2 (239–1,608)** | **61.0** | **25.7σ** | **11.2×** |
| **All ages** | Male | 1,281.7 (470–2,713) | 38.5 | 29.2σ | 33.3× |
|  | Female | 1,345.7 (352–3,505) | 31.3 | 39.0σ | 43.0× |
|  | **Both** | **1,313.1 (444–3,069)** | **34.8** | **34.7σ** | **37.8×** |

**Notes:** All rates per 100,000. Reference = 33 active conflict states excluding Palestine and Haiti. All p < 0.001. Male and Female values reproduced from manuscript V3; Both sexes rows derived from IHME GBD 2023 Results Tool (cause_id 294; all causes), summing across four major amputation subtypes (lower limb unilateral, lower limb bilateral, upper limb unilateral, upper limb bilateral). The <20 years band uses GBD's pre-built grouping as the closest available approximation to the CRC Article 1 child definition (<18 years). The 0–14 years sensitivity excludes the 15–19 age band. The 70+ years sensitivity provides a conservative older adult threshold. For Both sexes rows: Palestine rates extracted directly from GBD CSV; 95% UI computed as the sum of subtype upper and lower bounds; conflict-state reference mean computed as the mean of all 33 countries' combined Both sexes rates; z-scores derived from the reference distribution (mean ± SD, n = 33). Shading: green = Both sexes; blue = Male; yellow = Female.

**Supplementary Table S3.** Amputation incidence by five-year age band, Palestine 2023 vs. 33 active conflict states

| **Age band** | **Sex** | **Palestine rate /100k** | **Conflict-state mean /100k** | **Z-score** | **Fold above mean** |
| --- | --- | --- | --- | --- | --- |
| **<5 years** | Male | 1,740.1 | 11.5 | 163.3σ | 151.8× |
|  | Female | 3,142.2 | 33.2 | 65.1σ | 94.8× |
|  | **Both** | **2,424.1** | **22.0** | **84.4σ** | **110.0×** |
| **5–9 years** | Male | 1,422.3 | 24.9 | 40.6σ | 57.2× |
|  | Female | 909.0 | 24.1 | 26.1σ | 37.7× |
|  | **Both** | **1,171.9** | **24.5** | **33.6σ** | **47.8×** |
| **10–14 years** | Male | 1,731.0 | 15.5 | 140.9σ | 111.6× |
|  | Female | 931.1 | 24.6 | 28.6σ | 37.9× |
|  | **Both** | **1,340.7** | **20.0** | **61.1σ** | **67.1×** |
| **15–19 years** | Male | 1,003.8 | 116.7 | 4.5σ | 8.6× |
|  | Female | 1,562.6 | 61.3 | 16.5σ | 25.5× |
|  | **Both** | **1,276.7** | **89.1** | **8.5σ** | **14.3×** |
| **20–24 years** | Male | 3,262.7 | 86.1 | 24.2σ | 37.9× |
|  | Female | 3,402.9 | 92.3 | 23.3σ | 36.9× |
|  | **Both** | **3,331.3** | **89.4** | **24.3σ** | **37.3×** |
| **25–29 years** | Male | 1,181.4 | 37.7 | 27.0σ | 31.3× |
|  | Female | 870.2 | 17.9 | 43.3σ | 48.5× |
|  | **Both** | **1,029.6** | **27.7** | **32.7σ** | **37.2×** |
| **30–34 years** | Male | 570.5 | 28.2 | 20.8σ | 20.2× |
|  | Female | 535.6 | 14.7 | 37.1σ | 36.3× |
|  | **Both** | **553.4** | **21.4** | **27.0σ** | **25.9×** |
| **35–39 years** | Male | 363.3 | 25.4 | 16.5σ | 14.3× |
|  | Female | 430.3 | 13.3 | 35.9σ | 32.5× |
|  | **Both** | **396.7** | **19.3** | **23.9σ** | **20.6×** |
| **40–44 years** | Male | 294.4 | 24.7 | 14.7σ | 11.9× |
|  | Female | 412.1 | 13.6 | 36.5σ | 30.4× |
|  | **Both** | **353.0** | **19.1** | **23.1σ** | **18.5×** |
| **45–49 years** | Male | 306.5 | 25.6 | 14.6σ | 12.0× |
|  | Female | 550.3 | 15.8 | 39.2σ | 34.7× |
|  | **Both** | **426.8** | **20.7** | **25.2σ** | **20.6×** |
| **50–54 years** | Male | 317.9 | 28.0 | 14.4σ | 11.4× |
|  | Female | 431.3 | 17.0 | 36.3σ | 25.4× |
|  | **Both** | **373.1** | **22.4** | **22.9σ** | **16.7×** |
| **55–59 years** | Male | 870.3 | 39.1 | 23.3σ | 22.3× |
|  | Female | 493.9 | 21.1 | 36.0σ | 23.4× |
|  | **Both** | **687.6** | **29.7** | **28.7σ** | **23.1×** |
| **60–64 years** | Male | 1,005.0 | 44.4 | 23.9σ | 22.6× |
|  | Female | 513.7 | 24.6 | 35.9σ | 20.9× |
|  | **Both** | **765.6** | **33.8** | **29.7σ** | **22.6×** |
| **65–69 years** | Male | 1,000.8 | 48.6 | 25.9σ | 20.6× |
|  | Female | 1,027.3 | 36.8 | 40.7σ | 27.9× |
|  | **Both** | **1,014.1** | **42.2** | **34.1σ** | **24.1×** |
| **70–74 years** | Male | 495.4 | 47.1 | 20.3σ | 10.5× |
|  | Female | 1,368.5 | 48.3 | 41.8σ | 28.3× |
|  | **Both** | **938.8** | **47.9** | **32.7σ** | **19.6×** |
| **75–79 years** | Male | 129.4 | 52.0 | 4.5σ | 2.5× |
|  | Female | 1,017.1 | 59.9 | 36.0σ | 17.0× |
|  | **Both** | **611.9** | **56.6** | **25.7σ** | **10.8×** |
| **80–84 years** | Male | 185.0 | 69.9 | 4.4σ | 2.6× |
|  | Female | 446.8 | 79.7 | 12.2σ | 5.6× |
|  | **Both** | **340.5** | **75.6** | **9.6σ** | **4.5×** |
| **85–89 years** | Male | 217.0 | 89.6 | 3.5σ | 2.4× |
|  | Female | 423.3 | 103.5 | 7.5σ | 4.1× |
|  | **Both** | **343.0** | **97.8** | **6.3σ** | **3.5×** |
| **90–94 years** | Male | 349.2 | 111.3 | 5.1σ | 3.1× |
|  | Female | 446.4 | 119.0 | 6.7σ | 3.8× |
|  | **Both** | **412.1** | **115.5** | **6.6σ** | **3.6×** |
| **95+ years** | Male | 134.1 | 121.8 | 0.2σ | 1.1× |
|  | Female | 443.3 | 132.3 | 5.3σ | 3.3× |
|  | **Both** | **378.1** | **128.9** | **4.5σ** | **2.9×** |

**Notes:** All rates per 100,000. Reference = 33 active conflict states excluding Palestine and Haiti. All p < 0.001 except males 95+ years (z = 0.2σ, not significant). Male and Female values reproduced from manuscript V3 (95% UI not previously published in table form for individual 5-year bands). Both sexes rows: Palestine rates extracted directly from GBD 2023 CSV (cause_id 294; both sexes; individual 5-year age groups); 95% UI computed as the sum of subtype upper and lower bounds; conflict-state reference mean computed as the mean of all 33 countries' combined Both sexes rates at each 5-year age band; z-scores derived from the reference distribution (mean ± SD, n = 33). Shading: green = Both sexes (new); blue = Male; yellow = Female. "—" in 95% UI columns for Male/Female rows indicates UI not available in this standalone CSV extract; see manuscript Table S2 or GBD Results Tool for sex-disaggregated UIs.

**Supplementary Table S4.** Source data. Full GBD 2023 extraction (83,306+ rows) and UCDP/PRIO ACD v25.1 country-year conflict classification table is available upon request. All data are publicly available at vizhub.healthdata.org/gbd-results/ provided by the Institute for Health Metrics and Evaluation.
